# Supplementary material
Source: PubMed Central journal article supplement (PMC4663128)
Supplement: NIHMS735532-supplement.pdf [file NIHMS735532-supplement.pdf]

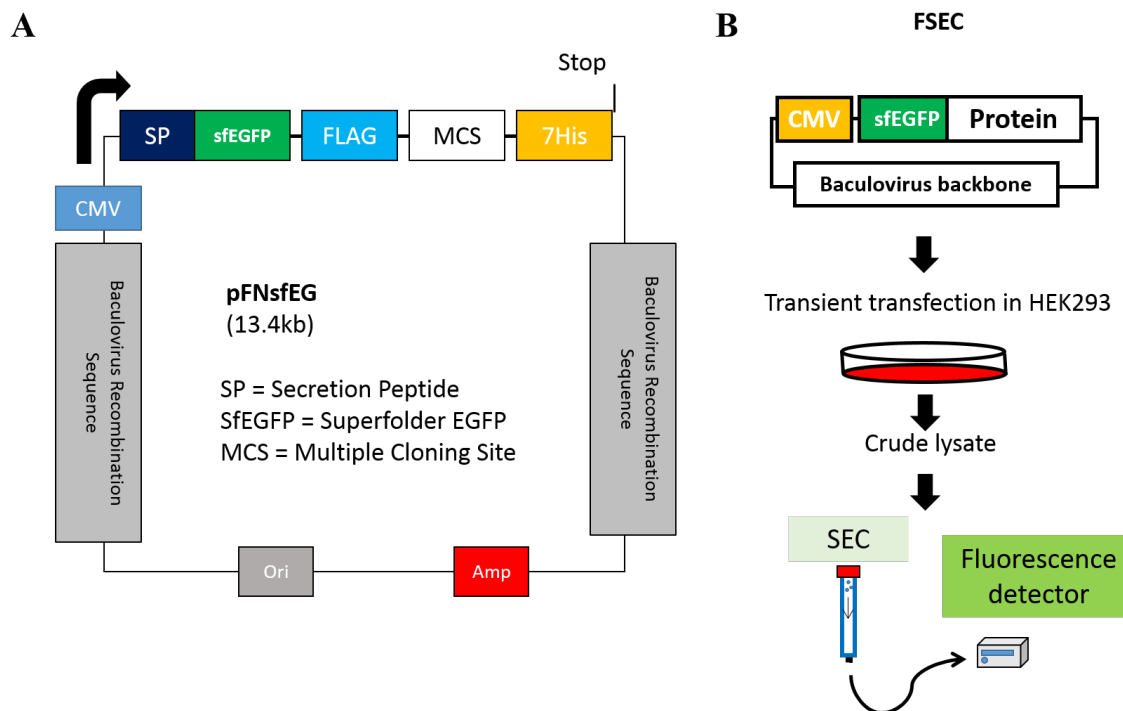

**Figure S1. pFNsfEG vector for FSEC.** (A) Map of pFNsfEG. (B) Work-flow for FSEC using pFNsfEG.

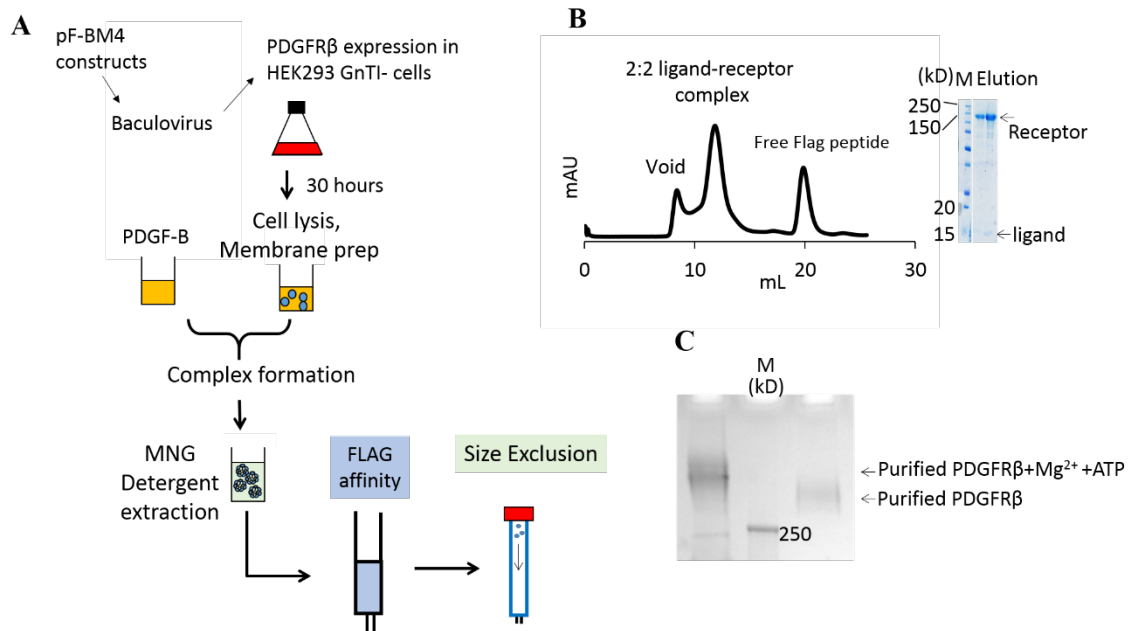

**Figure S2. Purification of PDGF-B/PDGFR $\beta$  complex in detergent.** (A) Workflow for complex purification. (B) Gel-filtration profile and SDS-PAGE of purified complex. (C) Purified receptor vs purified receptor+ATP+Magnesium.

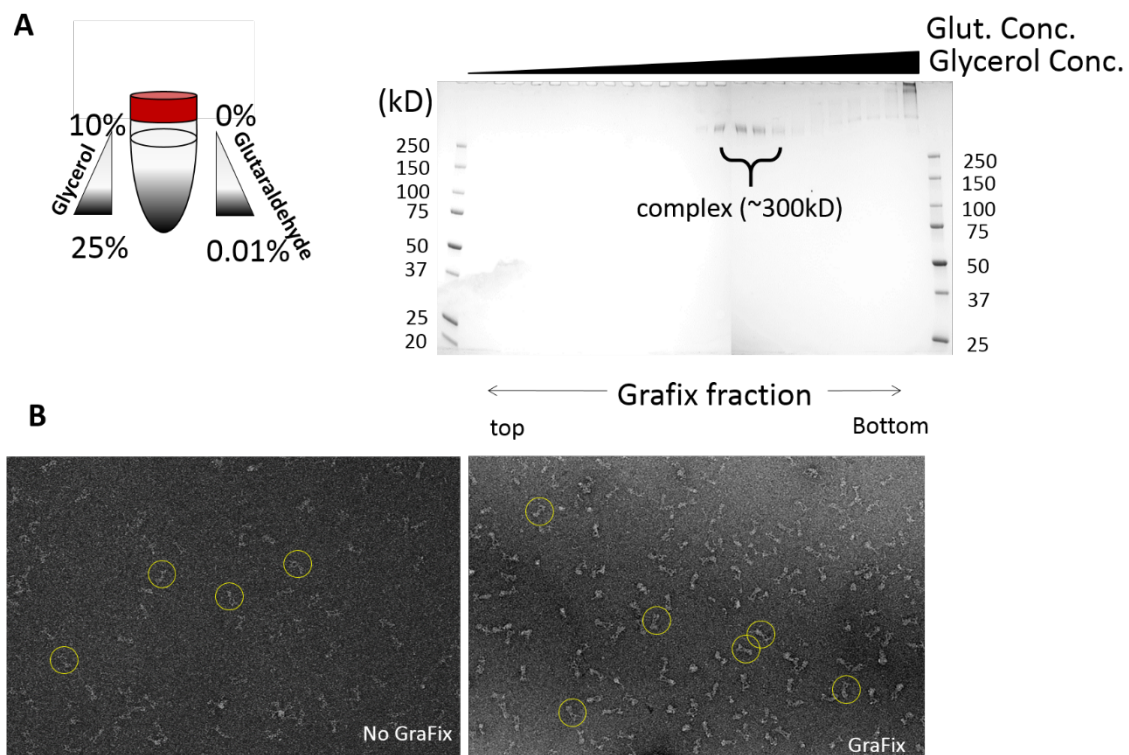

**Figure S3. GraFix purification of PDGF-B/PDGFR $\beta$  complex.** (A) Gradient setup (left). SDS-PAGE of GraFix fractions (right). (B) Micrographs from samples without GraFix (left) versus with GraFix (right) treatment.

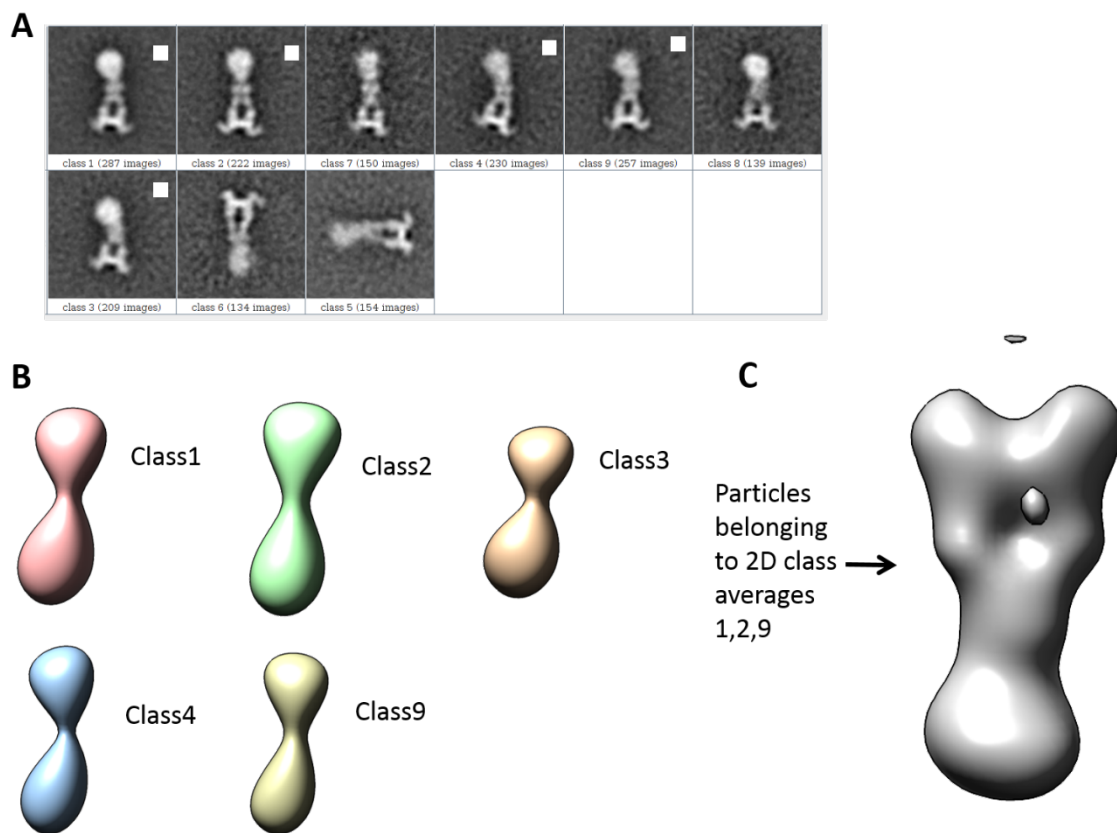

**Figure S4. Random conical tilt reconstruction.** (A) Classes used for reconstruction are marked with white squares. (B) Initial models. (C) Model from combined classes 1, 2, and 9.

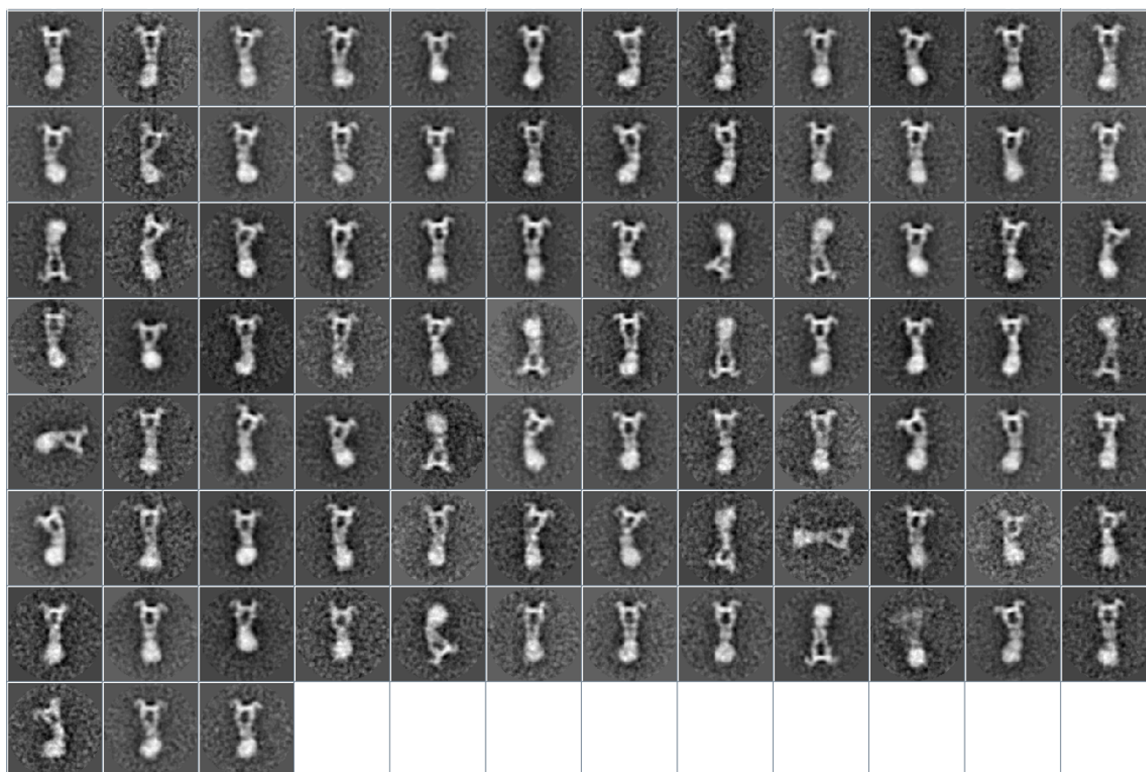

2D class average, 87 classes

**Figure S5. 2D class averages after data cleaning.**

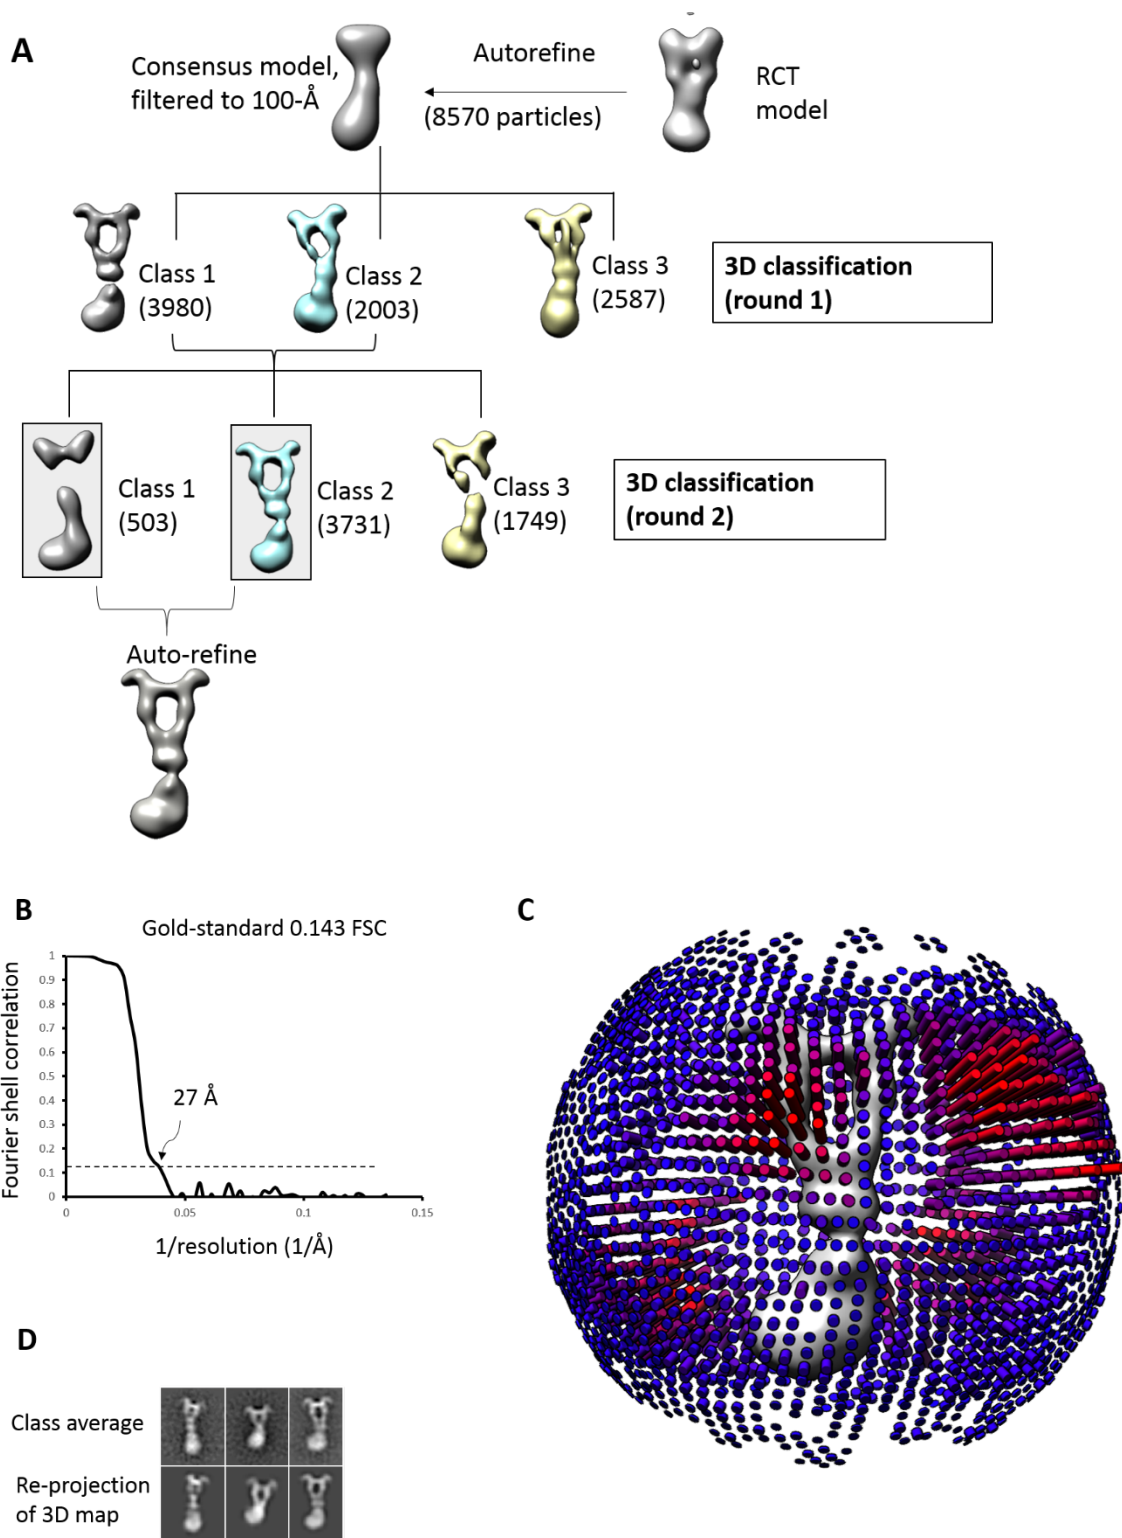

**Figure S6. 3D reconstruction.** (A) 3D classification scheme in RELION. (B) Gold-standard 0.143 criterion for resolution estimate. (C) Angular distribution shown in 3D,

with the height of a bar proportional to the number of observations from that angle. (D)

Class averages versus back-projections from 3D map.
